# Supplementary material
Source: PubMed Central journal article supplement (PMC4940277)

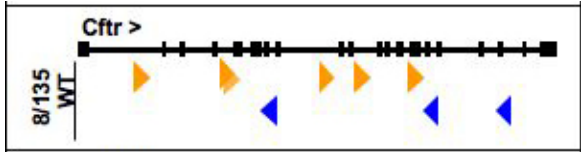

**Supp. Figure 1. Orientation of SB insertions in mouse *Cftr* gene.** Analysis of *Sleeping Beauty* transposon insertions in a screen conducted in *Apc* wildtype mice (Starr *et al.*, Science, 2009) by next generation sequencing found intragenic *Cftr* insertions in 8/135 tumors. The orientation of insertions in both the forward and reverse direction is consistent with a model of gene inactivation.

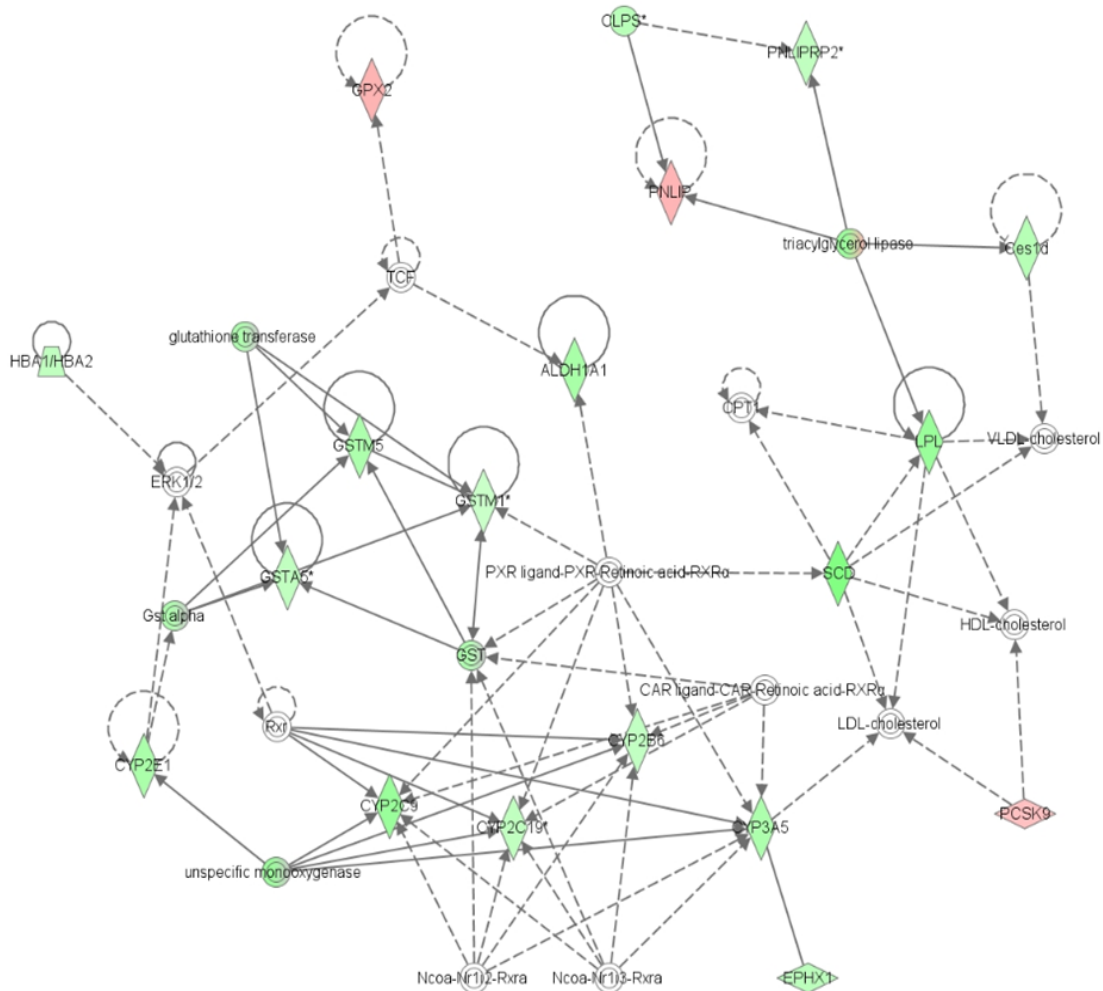

**Supp Fig. 2A. Small intestine. IPA- Drug Metabolism, Small Molecule Biochemistry and Lipid Metabolism**

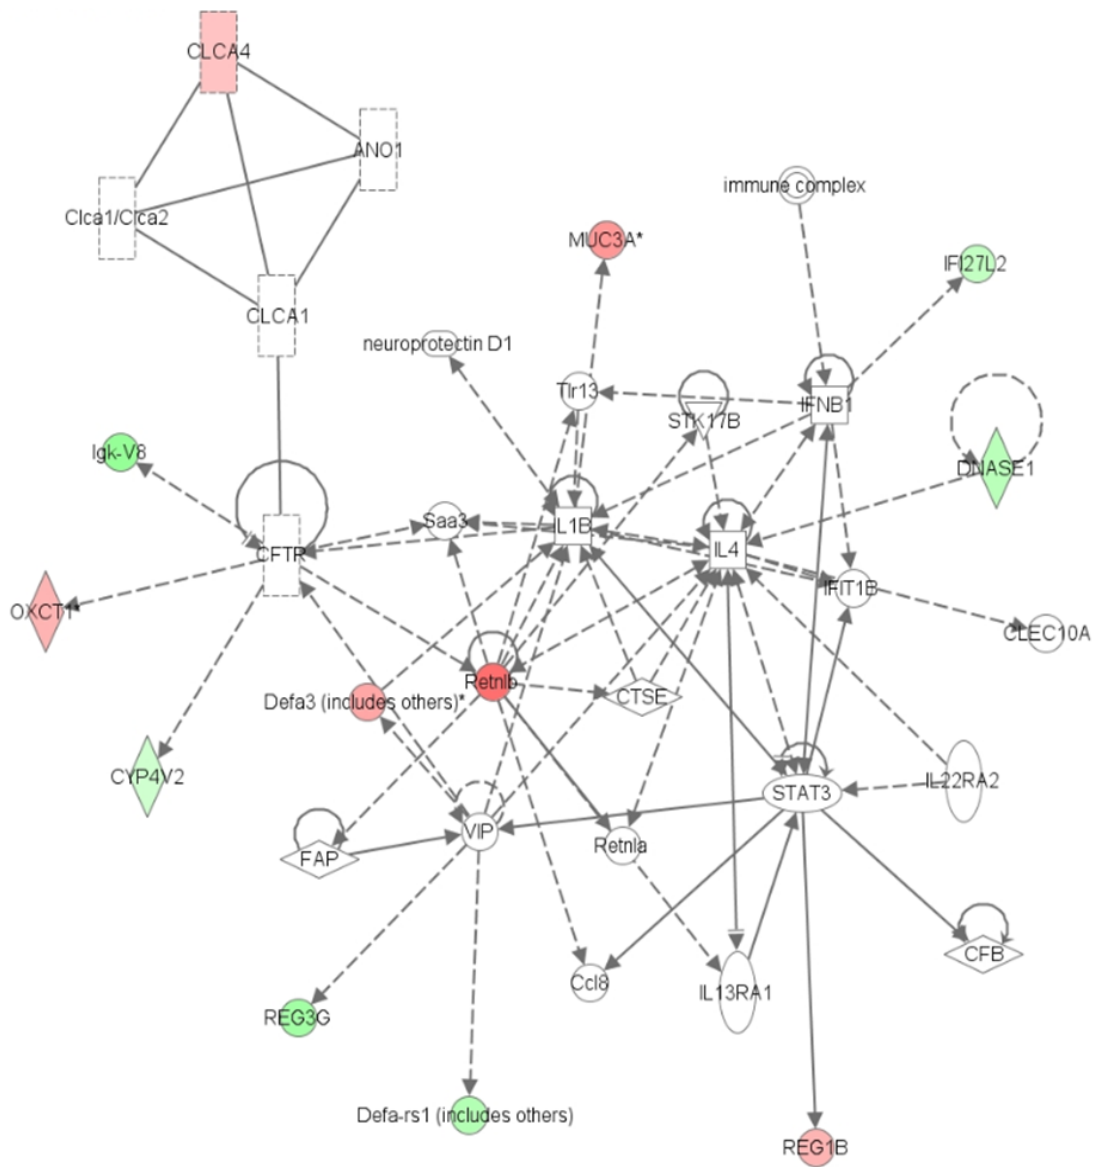

**Supp. Fig. 2B. Small Intestine. IPA- Molecular Transport, Gastrointestinal Disease and Inflammatory Disease**

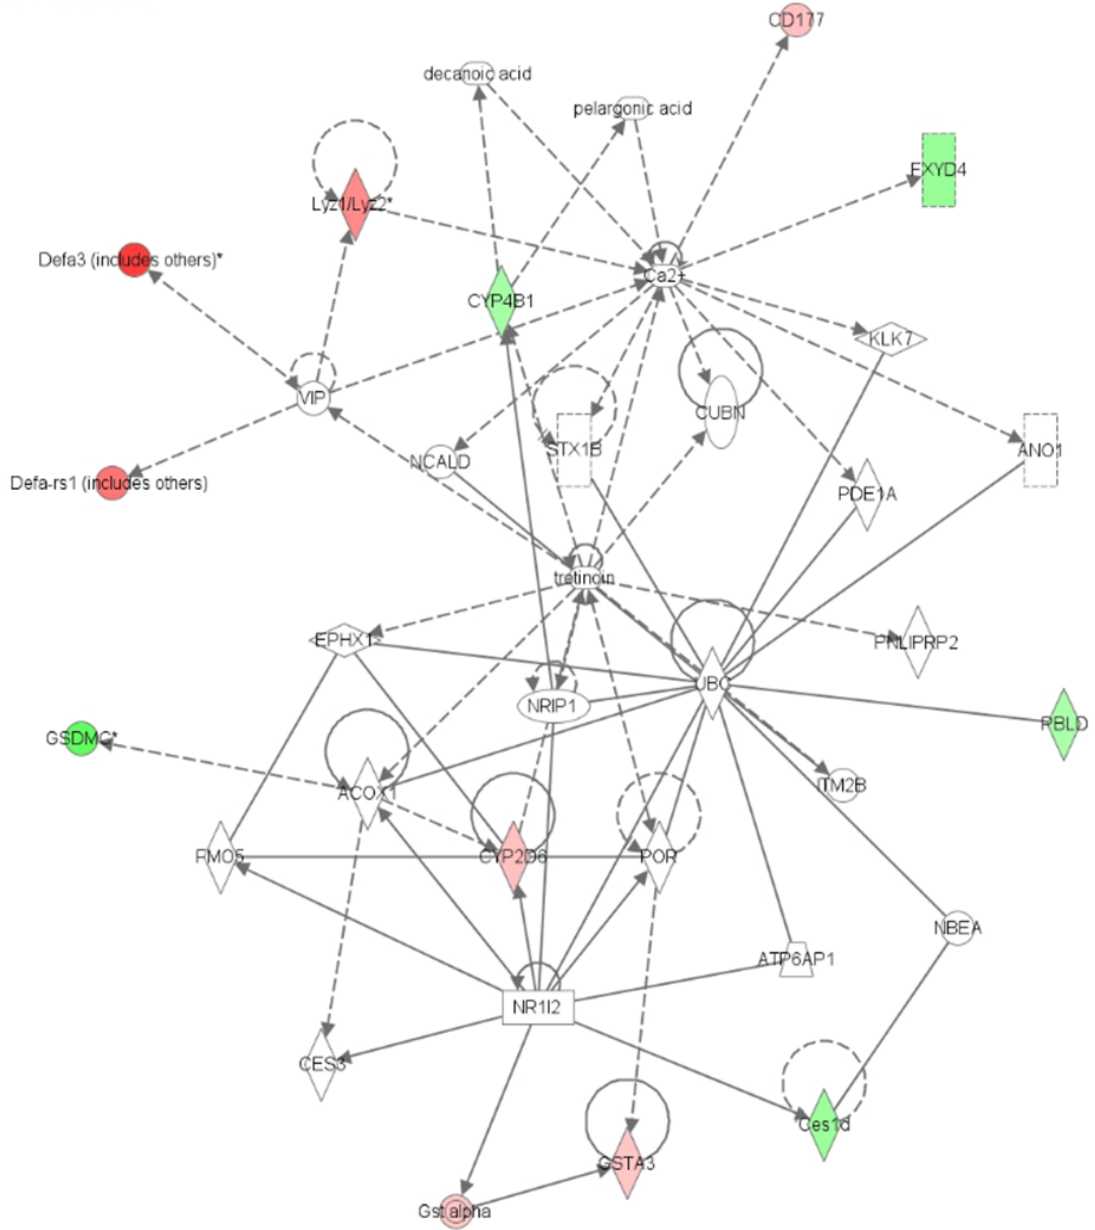

**Supp. Fig. 2C. Colon. IPA- Molecular Transport, Lipid Metabolism and Small Molecule Biochemistry**

1

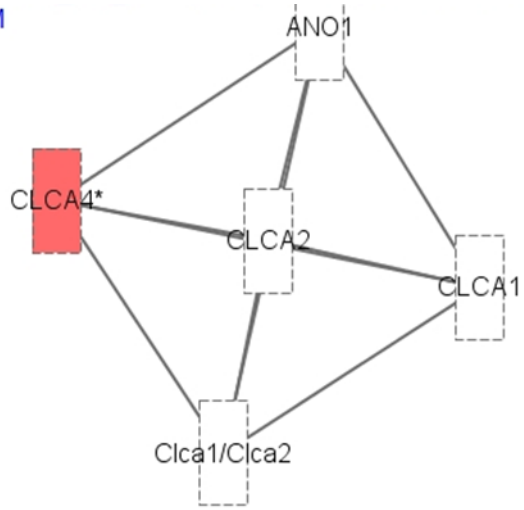

**Supp. Fig. 2D. Colon.** IPA- Cellular Growth and Proliferation, Renal and Urological System Development and Function

**Supp. Fig. 3. GSEA showing enrichment plots comparing global gene expression in *Cftr*-depleted intestinal tissues to Indicated gene signatures.** *Cftr*-deficient vs. *Cftr*-expressing normal epithelial-enriched intestine were compared. Gene signatures consist of (a) genes upregulated in *Kcnq1* KO small intestine (Than *et al.*, 2014), (b) genes upregulated in *Kcnq1* KO colon (Than *et al.*, 2014), (c) genes downregulated in *Muc2* small intestine (Yang *et al.*, 2008). (d) Enrichment score (ES), normalized ES (NES), nominal p value (p) and false discovery rate q-value (FDR) are shown for each value.

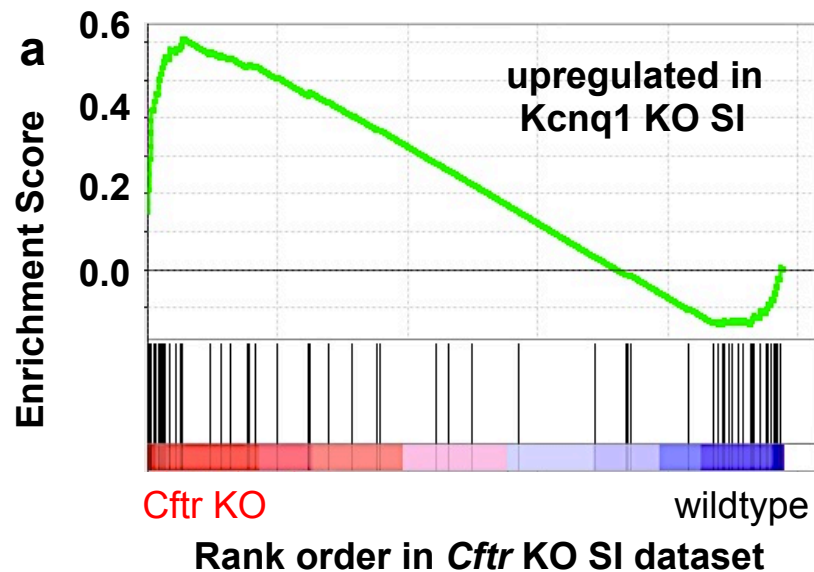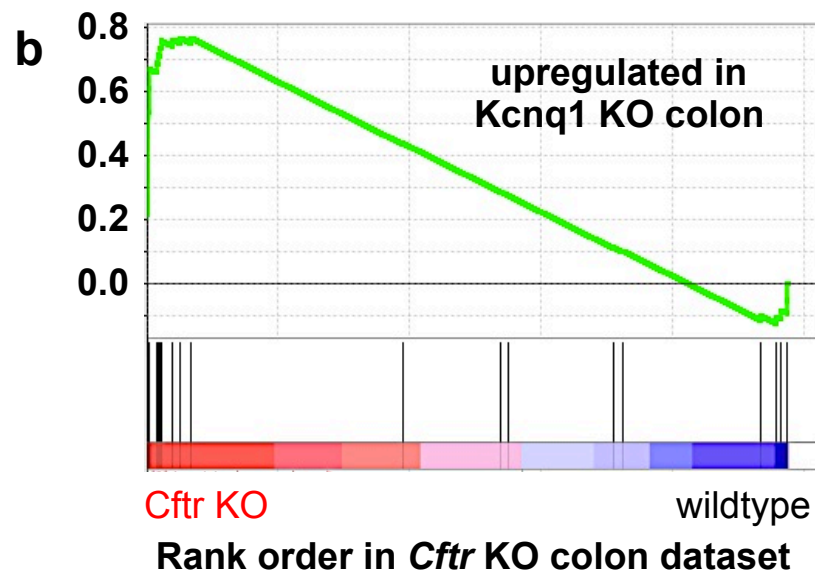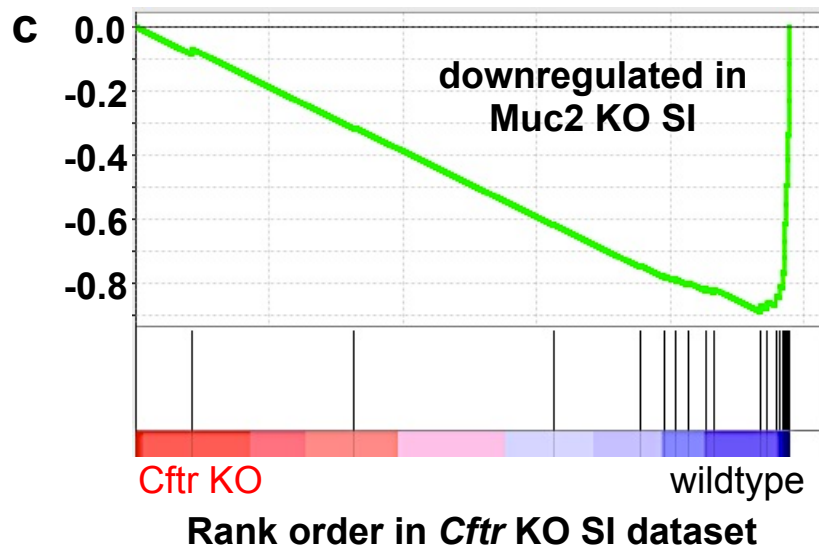

**d**

| Gene Signature           | vs. <i>Cftr</i> KO microarray |       |        |        |
|--------------------------|-------------------------------|-------|--------|--------|
|                          | ES                            | NES   | p      | FDR    |
| a up in <i>Kcnq1</i> KO  | 0.61                          | 1.88  | <0.001 | <0.001 |
| b up in <i>Kcnq1</i> KO  | 0.77                          | 2.06  | <0.001 | <0.001 |
| c down in <i>Muc2</i> KO | -0.889                        | -2.53 | <0.001 | <0.001 |

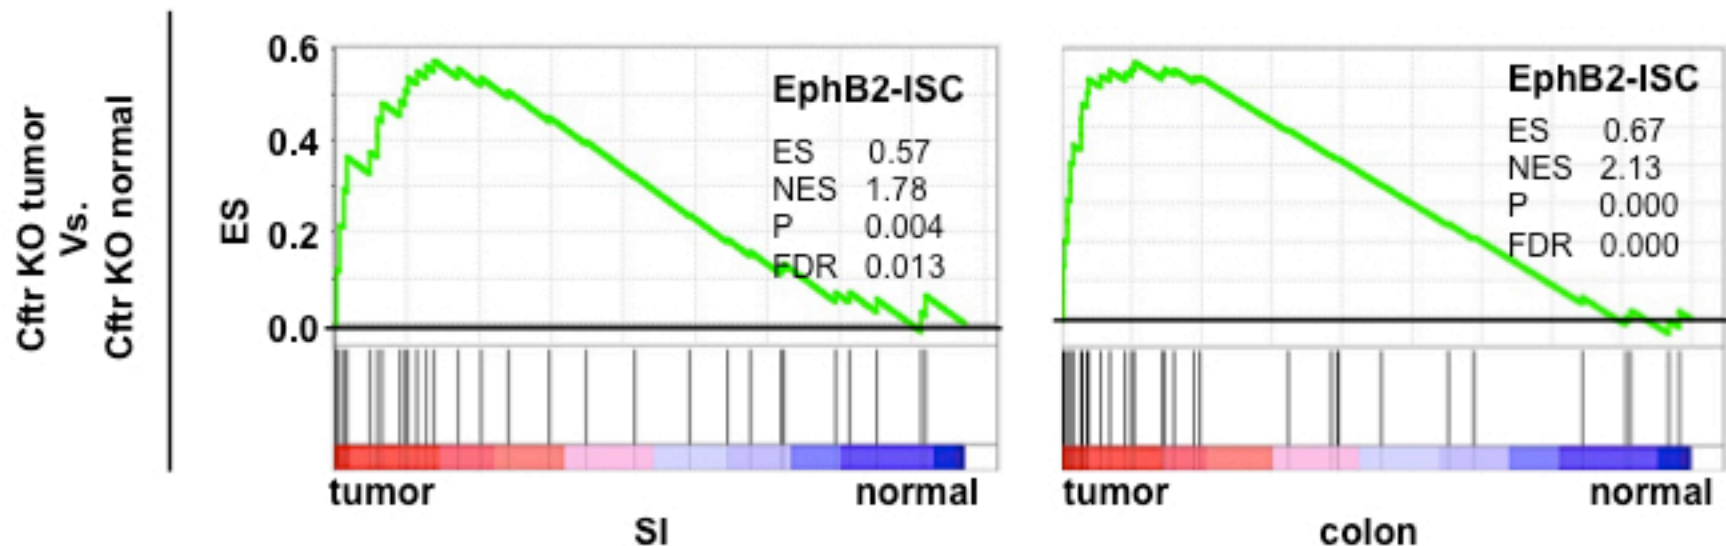

**Supp. Fig. 4. GSEA showing enrichment plots comparing global gene expression in *Cfr*-depleted intestinal tissues to indicated gene signature. *Cfr*-deficient tumor vs. *Cfr*-deficient normal epithelial-enriched intestine were compared. The gene signature consists of genes upregulated in intestinal epithelial stem cells identified by EphB2<sup>hi</sup> expression (Merlos-Suarez et al., 2011). Enrichment score (ES), normalized ES (NES), nominal p-value (p) and false discovery rate q-value (FDR) are shown for each value.**

**Supp. Fig. 5. Deficiency for *Cftr* enhances colon organoid outgrowth.** 5 pairs of male littermate-matched C57Bl/6J *Cftr<sup>fl/fl</sup>* and *Cftr<sup>fl/fl</sup> Villin-Cre<sup>+</sup>* mice were sacrificed between 8 and 12 weeks of age. Colons were removed, cut open and washed in cold PBS. Colon organoids were then cultured using the protocol of Sato et al, 2011, following the plating of 500 crypt bottoms per well in triplicate per sample. \* P < 0.05.

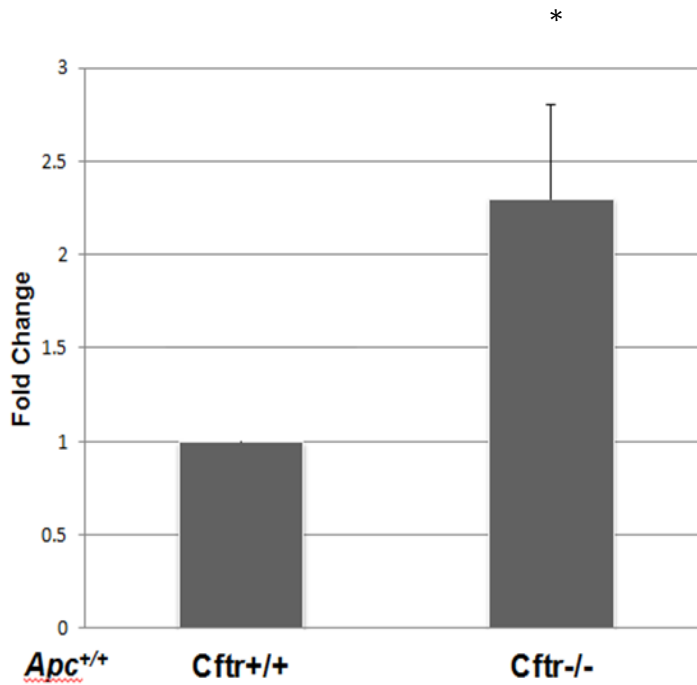



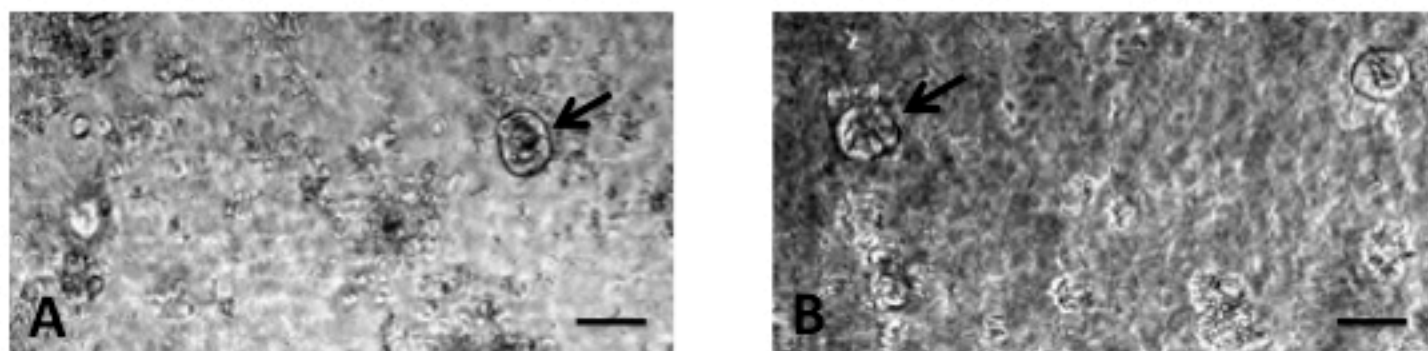

**Supplemental Figure 5B. No morphological differences between C57Bl/6J  $Cftr^{fl/fl}$  (Panel A, bar = 10X) and  $Cftr^{fl/fl}$  Villin-Cre<sup>+</sup> (Panel B, bar = 10X) colon organoids.** Examples of colon organoids are indicated by arrows in both panels.

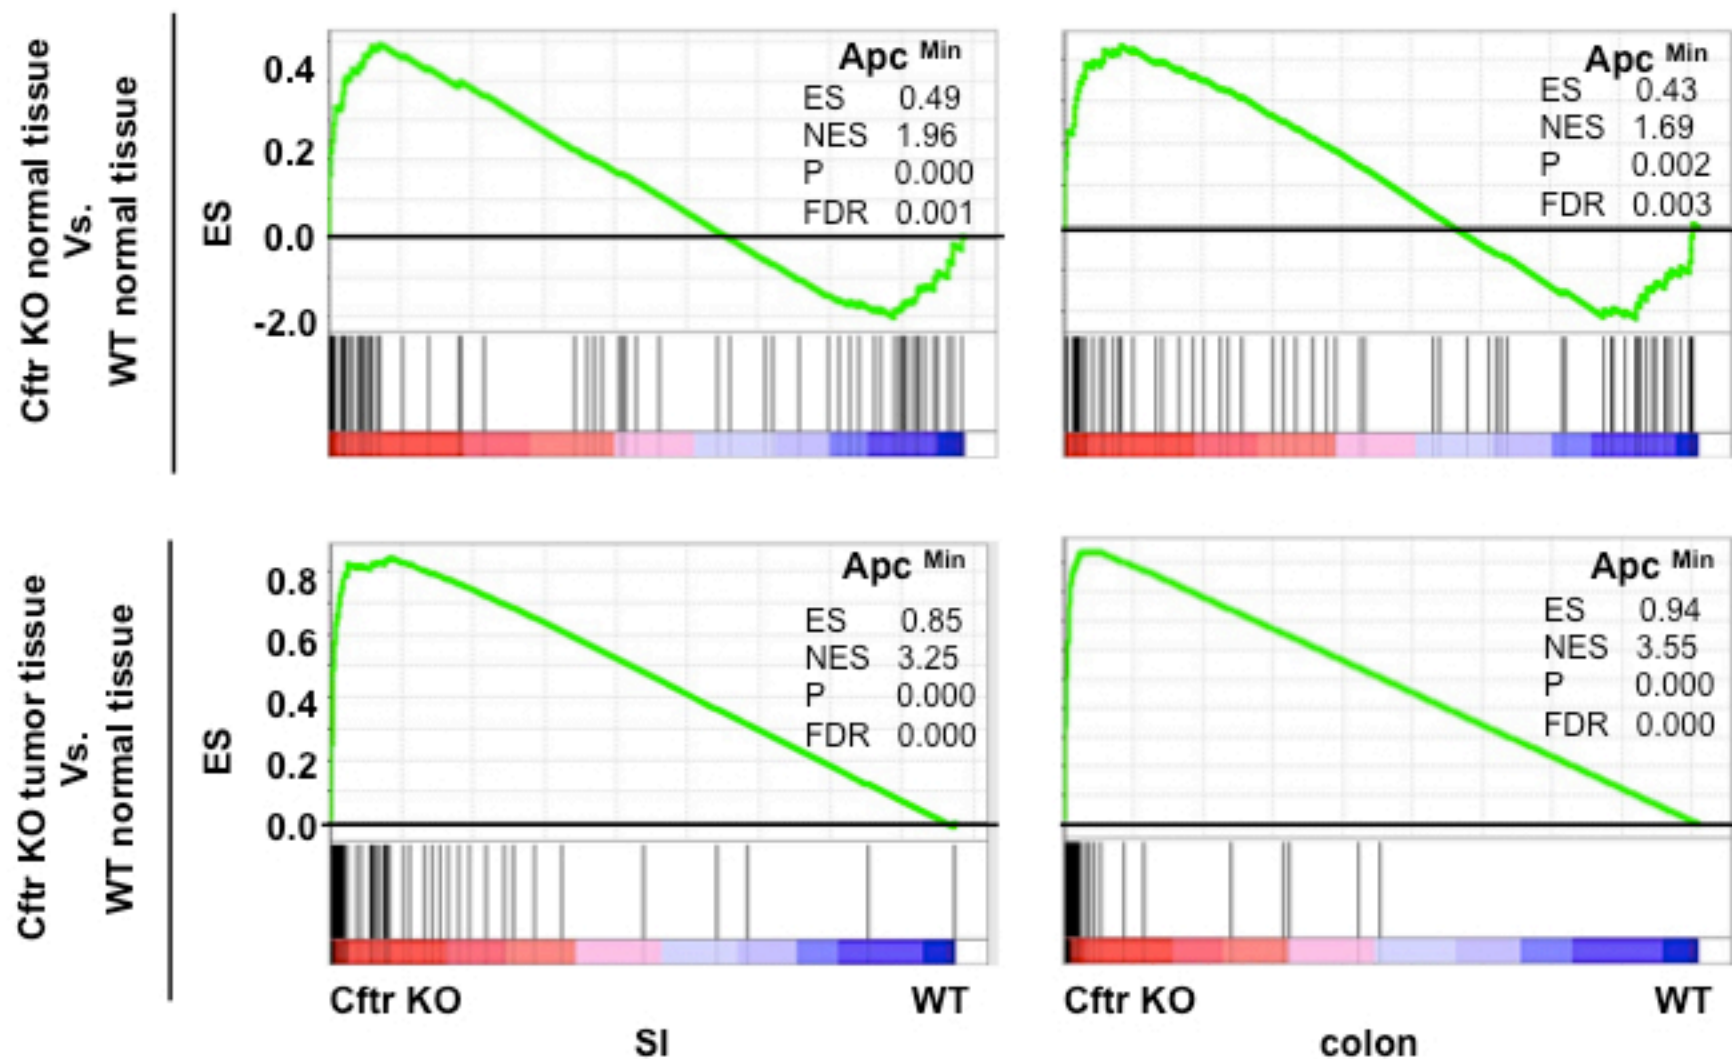

**Supp. Fig. 6. GSEA showing enrichment plots comparing global gene expression in *Cftr*-depleted intestinal tissues to indicated gene signatures. *Cftr*-deficient (tumor or normal) vs. *Cftr*-expressing normal epithelial-enriched intestine were compared. Gene signature consists of genes upregulated in *Apc<sup>Min</sup>* adenomas (SI or colon). Enrichment score (ES), normalized ES (NES), nominal p-value (p) and false discovery rate q-value (FDR) are shown for each value.**

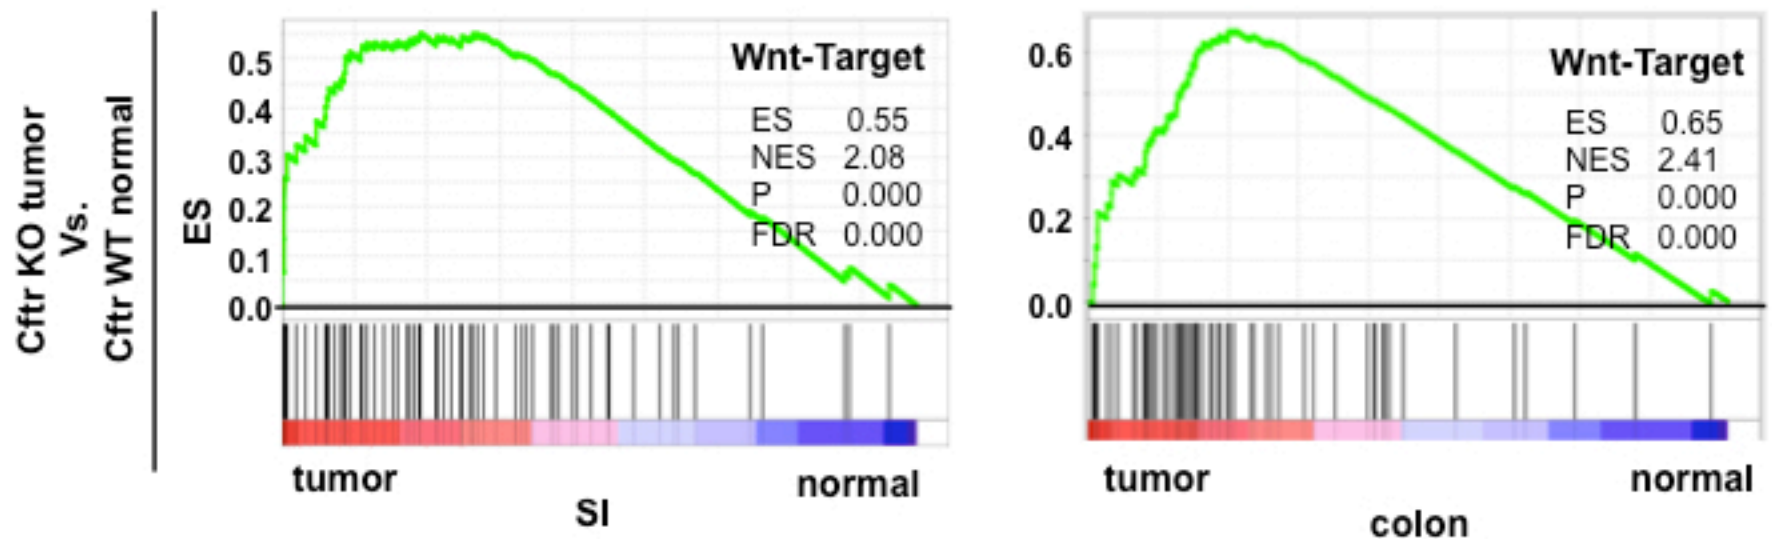

**Supp. Fig. 7.** GSEA showing enrichment plots comparing global gene expression in *Cftr*-depleted intestinal tissues to indicated gene signatures. *Cftr*-deficient tumors vs. *Cftr*-expressing normal epithelial-enriched intestine were compared. Gene signatures consist of Wnt target genes (van der Flier et al., 2007). Enrichment score (ES), normalized ES (NES), nominal p-value (p) and false discovery rate q-value (FDR) are shown for each value.

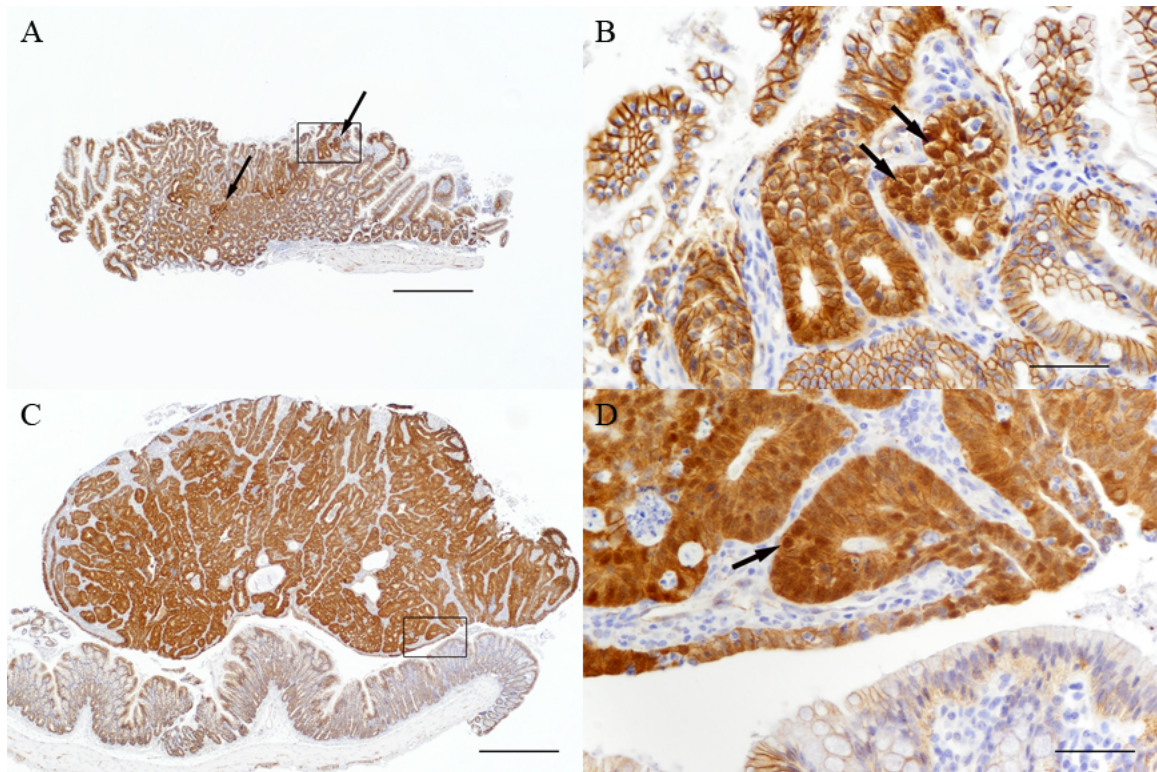

**Supp. Figure 8.  $\beta$ -catenin immunohistochemistry.**

Representative image of analysis of 4 small intestine adenomas (2 jejunum, 1 ileum, 1 duodenum) from  $Apc^{+/+} Cftr^{fl/fl}-Villin-Cre$  mice and similar adenomas from  $Apc^{Min}$  mice.

Panel A. Small intestine adenoma from  $Apc^{+/+} Cftr^{fl/fl}-Villin-Cre$  mouse showing multifocal areas with increased expression of  $\beta$ -catenin (arrows).

Panel B. Same adenoma as in panel A shows increased cytoplasmic labelling and nuclear translocation of  $\beta$ -catenin (arrows).

Panel C. Small intestine adenoma from  $Apc^{Min}$  mouse shows diffuse increased expression of  $\beta$ -catenin (arrow).

Panel D. Same adenoma as in panel C shows increased cytoplasmic labelling and nuclear translocation of  $\beta$ -catenin (arrow).

Panels B and D are high magnification images of the areas indicated by rectangular boxes in Panels A and C, respectively. Bars in panels A and C, and B and D are 500 and 50  $\mu$ m, respectively.

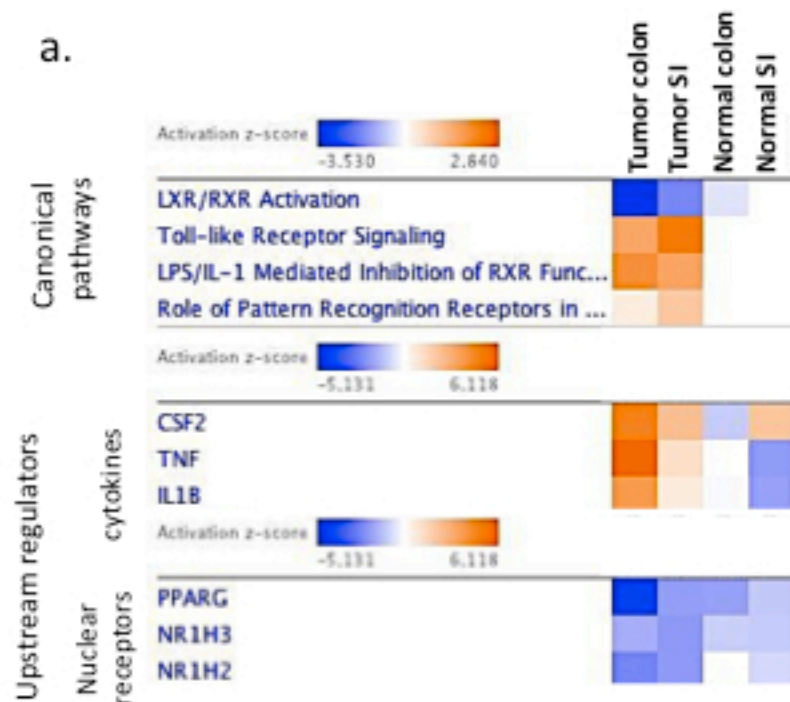

**Supp. Fig. 9.** IPA analysis of gene expression changes in each of four *Cftr*-deficient tissues: colon tumor, small intestine (SI) tumor, normal colon, and normal SI, to identify pathways with overlapping changes in gene expression.

a. Heatmap of z-scores indicating overlap of LXR/RXR, Toll-like receptor, related canonical pathways, and upstream regulators with gene expression changes in *Cftr*-deficient tissues. Z-score indicating extent and direction of overlap for each pathway is shown.

b. Heatmap representing expression levels of overlapping genes in LXR/RXR and Toll-like receptor pathways in each tissue is shown.

b.

Genes in the Toll-like Receptor Signaling

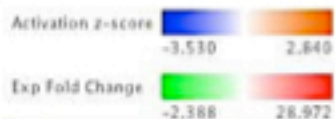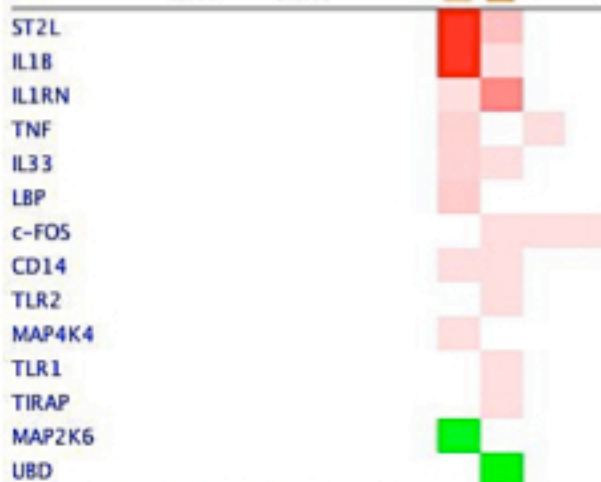

© 2000-2015 QIAGEN. All rights reserved.

Genes in the LXR/RXR Activation network

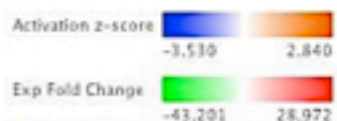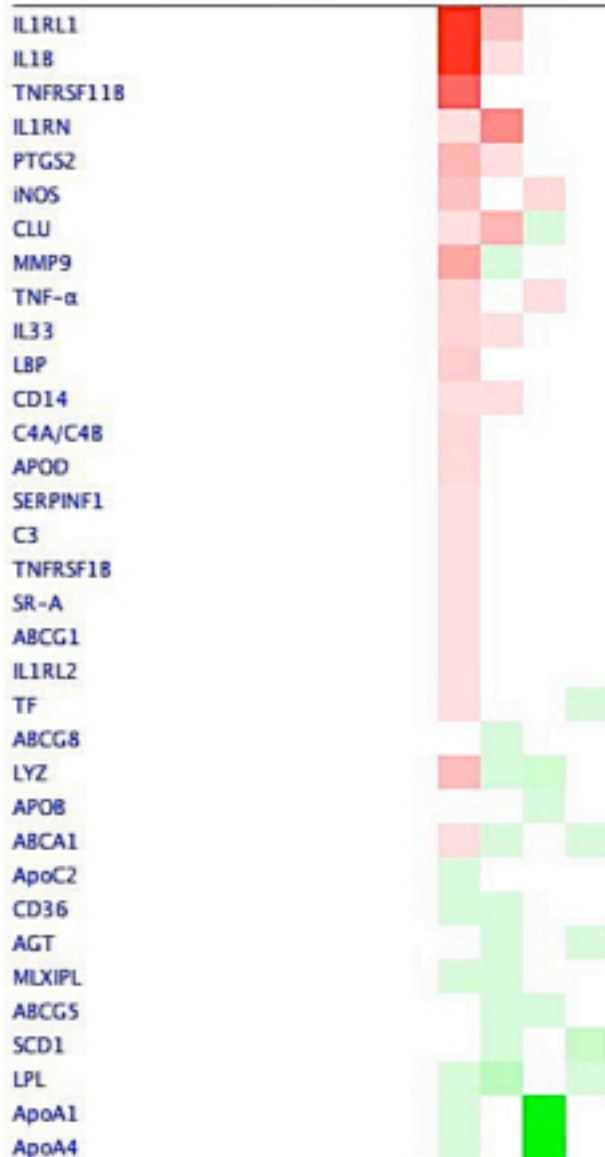

© 2000-2015 QIAGEN. All rights reserved.

# Supp. Fig. 10. Gene expression analyses based on RNA Seq data from AMC90 cohort

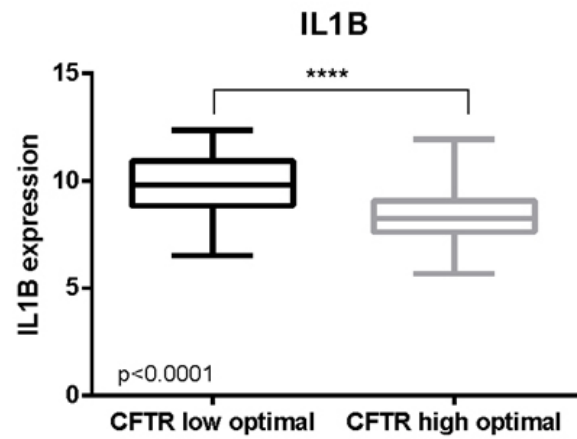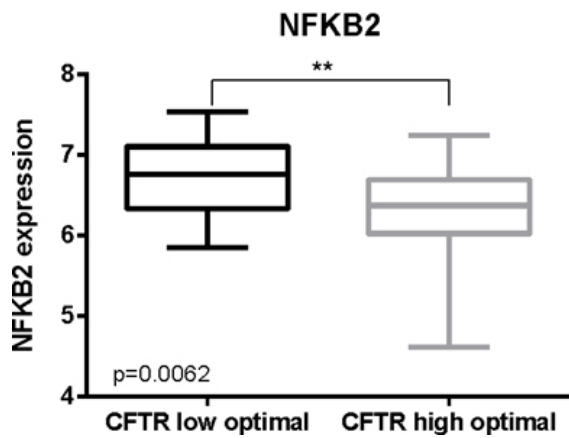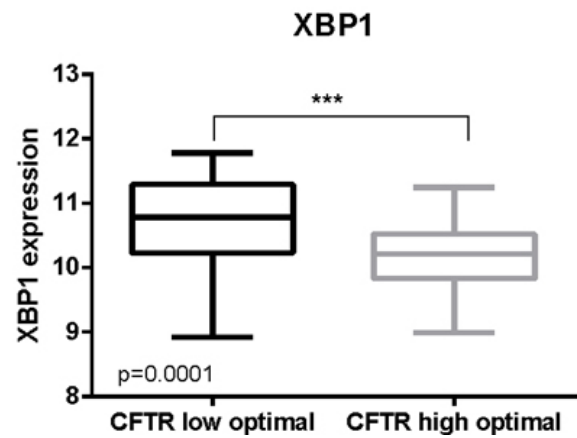

Supplement: NIHMS789832-supplement-Supplementary_Figures_1-10.pdf [file NIHMS789832-supplement-Supplementary_Figures_1-10.pdf]
