# Supplementary material
Source: PubMed Central journal article supplement (PMC4940277)
Supplement: NIHMS789832-supplement-Supplementary_Table_14.pdf [file NIHMS789832-supplement-Supplementary_Table_14.pdf]

**Supp. Table 14. Overlap of stem cell gene signatures in *Cftr* KO tumors with *Apc*<sup>Min</sup> tumors.** GSEA was used to identify leading edge genes enriched in *Cftr* KO or *Apc*<sup>Min</sup> tumors. Leading edge genes enriched in *Cftr* KO that overlap with those in *Apc*<sup>Min</sup> are shown in red.

| Geneset<br>Tissue<br>Enriched in<br>NES | EphB2-ISC<br>SI |               | Hu-LGR5-ISC<br>colon |               |
|-----------------------------------------|-----------------|---------------|----------------------|---------------|
|                                         | Cftr-KO tumor   | Apc Min tumor | Cftr-KO tumor        | Apc Min tumor |
|                                         | 1.78            | 2.37          | 2.23                 | 1.71          |
| Genes in leading edge                   | TUBB2B          | SOAT1         | ABTB2                | FMNL2         |
|                                         | PSRC1           | PXDN          | AXIN2                | KIF12         |
|                                         | CENPF           | TUBB2B        | EPHA4                | FGFR4         |
|                                         | TEAD2           | PSRC1         | FAM64A               | SCN2B         |
|                                         | FSTL1           | TEAD2         | FGFR4                | DTL           |
|                                         | EPHB3           | FSTL1         | FMNL2                | MPP3          |
|                                         | SORCS2          | EPHB3         | FSTL1                | NPNT          |
|                                         | ST3GAL3         | LGR5          | GRAMD1A              | SOX4          |
|                                         | CD44            | SORCS2        | IGFBP4               | FSTL1         |
|                                         | CHST11          | ASCL2         | IL17RD               | APCDD1        |
|                                         | PHGDH           | KLHL8         | KIF12                | IL17RD        |
|                                         | ESAM            | ST3GAL3       | LGR5                 | LGR5          |
|                                         | ARL4C           | NAV1          | LIFR                 | EPHA4         |
|                                         | IGFBP4          | CD44          | MPP3                 | FAM64A        |
|                                         |                 | CHST11        | NPNT                 | RNF157        |
|                                         |                 | PHGDH         | PITPNC1              | TNFRSF19      |
|                                         |                 | ASRGL1        | RNF157               | PITPNC1       |
|                                         |                 | TGIF2         | SERTAD4              | AXIN2         |
|                                         |                 | LFNG          | SOX4                 | IGFBP4        |
|                                         |                 | ARL4C         | TNFRSF19             |               |
|                                         | IGFBP4          | UTRN          |                      |               |
